# Supplementary material for: Gauging lipid vulnerabilities in mRNA-LNPs under various environmental stressors through TIMS-TOF analysis
Source: Royal Society of Chemistry journal article supplement (doi:10.1039/d5ra08835f), 2026-04-10
Supplement: d5ra08835f1.xlsx [file d5ra08835f1.xlsx]

## Sheet: Sheet1
	Data File	MC3+3O		%MC3+3O	MC3+2O		%	MC3+O		%	MC3			%MC3
control	GMU_ASMS_A0_1_1_3742	0			5443			409511			873508608
	GMU_ASMS_A0_1_2_3743	0			4899			510541			897900480
	GMU_ASMS_A0_1_3_3744	962	320.667	3.38554e-05	2110	4150.67	0.00043822	460727	460260	0.0485933	1070089024	9.47166e+08		100
heat	GMU_ASMS_A1_2_1_3745	10677		0	4364		0	2227225		0	967084992			0
	GMU_ASMS_A1_2_2_3746	10546		0	0		0	2053794		0	898925376			0
	GMU_ASMS_A1_2_3_3747	2035	7752.67	0.000818512	8459	4274.33	0.000451276	2125434	2.13548e+06	0.22546	913645952	9.26552e+08		97.8236
UV	GMU_ASMS_A2_3_1_3748	8995312		0	1034566		0	14446669		0	2716311			0
	GMU_ASMS_A2_3_2_3749	8926578		0	1199345		0	12956008		0	1212124			0
	GMU_ASMS_A2_3_3_3750	9563944	9.16194e+06	0.967301	1168754	1.13422e+06	0.119749	15856519	14419732	1.52241	697152	1.54186e+06		0.162787
Oxidation	GMU_ASMS_A3_4_1_3751	6148		0	3845		0	17394		0	371796			0
	GMU_ASMS_A3_4_2_3752	0		0	2470		0	5746		0	265156			0
	GMU_ASMS_A3_4_3_3753	0	2049.33	0.000216365	2154	2823	0.000298047	6964	10034.7	0.00105944	113725	250226		0.0264184
Freeze/thaw	GMU_ASMS_A4_5_1_3754	11319		0	0		0	1439594		0	359431104			0
	GMU_ASMS_A4_5_2_3755	9227		0	2054		0	1251388		0	839957824			0
	GMU_ASMS_A4_5_3_3756	8941	9829	0.00103773	2590	1548	0.000163435	2103225	1598069	0.168721	455066816	551485248		58.2248
	Data File	SM102+3O			SM102+2O			SM102+O			SM102
control	GMU_ASMS_C0_25_1_3772				0			0			475815264
	GMU_ASMS_C0_25_2_3773				0			0			472564512
	GMU_ASMS_C0_25_3_3774		#DIV/0!	#DIV/0!	0	0	0	1222	407.333	8.38614e-05	508786112	4.85722e+08		100
heat	GMU_ASMS_C1_26_1_3775			0	10838		0	1489		0	410345056			0
	GMU_ASMS_C1_26_2_3776			0	0		0	0		0	453124704			0
	GMU_ASMS_C1_26_3_3777		#DIV/0!	#DIV/0!	0	3612.67	0.000743773	2224	1237.67	0.00025481	465160352	442876704		91.1791
UV	GMU_ASMS_C2_27_1_3778	4312260		0	1091969		0	0		0	2510926			0
	GMU_ASMS_C2_27_2_3779	4689387		0	1181364		0	0		0	1093912			0
	GMU_ASMS_C2_27_3_3780	4710188	4.57061e+06	0.940993	1132350	1.13523e+06	0.23372	0	0	0	734397	1.44641e+06		0.297786
Oxidation	GMU_ASMS_C3_28_1_3781			0	9398		0	16679		0	4172085			0
	GMU_ASMS_C3_28_2_3782			0	21481		0	0		0	4274838			0
	GMU_ASMS_C3_28_3_3783		#DIV/0!	#DIV/0!	21587	17488.7	0.00360055	0	5559.67	0.00114462	4657772	4.36823e+06		0.899328
Freeze/thaw	GMU_ASMS_C4_29_1_3784			0	0		0	0		0	430379168			0
	GMU_ASMS_C4_29_2_3785			0	0		0	1316		0	448175552			0
	GMU_ASMS_C4_29_3_3786		#DIV/0!	#DIV/0!	0	0	0	1442	919.333	0.000189272	387252320	421935680		86.8677
	Data File	ALC+3O			ALC+2O			ALC+O			ALC
control	GMU_ASMS_B0_13_1_3757				7651			589113			588777088
	GMU_ASMS_B0_13_2_3758				0			410403			600814720
	GMU_ASMS_B0_13_3_3759			0	0	2550.33	0.000419327	706496	568671	0.0935012	634996864	608196224		100
heat	GMU_ASMS_B1_14_1_3760			0	4008		0	1409138		0	564451904			0
	GMU_ASMS_B1_14_2_3761			0	0		0	1465922		0	627369408			0
	GMU_ASMS_B1_14_3_3762			0	0	1336	0.000219666	1469895	1.44832e+06	0.238133	601451072	5.97757e+08		98.2837
UV	GMU_ASMS_B2_15_1_3763	3857606		0	701004		0	601160832		0	8031338			0
	GMU_ASMS_B2_15_2_3764	4071331	3.96447e+06	0.65184	795724		0	608101824		0	3128805			0
	GMU_ASMS_B2_15_3_3765			0	1419073	971934	0.159806	604399872	604554176	99.4012	2226145	4462096		0.733661
Oxidation	GMU_ASMS_B3_16_1_3766			0	54082		0	26484178		0	37800896			0
	GMU_ASMS_B3_16_2_3767			0	55386		0	29989458		0	48622760			0
	GMU_ASMS_B3_16_3_3768			0	67927	59131.7	0.00972247	29489916	2.86545e+07	4.71139	42365140	4.29296e+07		7.05851
Freeze/thaw	GMU_ASMS_B4_17_1_3769			0	5362		0	981828		0	580546432			0
	GMU_ASMS_B4_17_2_3770			0	0		0	1519893		0	560230784			0
	GMU_ASMS_B4_17_3_3771			0	0	1787.33	0.000293874	1469255	1.32366e+06	0.217637	600565248	580447488		95.4375
	MC3% (MC3 peak area/MC3 control)	MC3+O% (MC3+O peak are/MC3 control)	MC3+2O% (MC3+2O peak are/MC3 control)	MC3+3O% (MC3+3O peak are/MC3 control)
Control	100	0.0485933	0.00043822	3.38554e-05
Heat	97.8236	0.22546	0.000451276	0.000818512
UV	0.162787	1.52241	0.119749	0.967301
Oxidation	0.0264184	0.00105944	0.000298047	0.000216365
Freeze/Thaw	58.2248	0.168721	0.000163435	0.00103773
	SM102% (SM102 peak area/SM102 control)	SM102+O% (SM102+O peak are/SM102 control)	SM102+2O% (SM102+2O peak are/SM102 control)	SM102+3O% (SM102+3O peak are/SM102 control)
Control	100	8.38614e-05	0	0
Heat	91.1791	0.00025481	0.000743773	0
UV	0.297786	0	0.23372	0.940993
Oxidation	0.899328	0.00114462	0.00360055	0
Freeze/Thaw	86.8677	0.000189272	0	0
	ALC% (ALC peak area/ALC control)	ALC+O% (ALC+O peak are/ALC control)	ALC+2O% (ALC+2O peak are/ALC control)	ALC+3O% (ALC+3O peak are/ALC control)
Control	100	0.0935012	0.000419327	0
Heat	98.2837	0.238133	0.000219666	0
UV	0.733661	99.4012	0.159806	0.65184
Oxidation	7.05851	4.71139	0.00972247	0
Freeze/Thaw	95.4375	0.217637	0.000293874	0
